# Supplementary material for: Perioperative tislelizumab with four cycles of neoadjuvant chemotherapy for resectable locally advanced esophageal squamous cell carcinoma: a phase 2 study
Source: PubMed Central journal article supplement (PMC11647006; doi:10.3389/fimmu.2024.1482005), 2024-12-02
Supplement: DataSheet1.pdf [file DataSheet1.pdf]

**Supplementary Table 1. Treatment-related adverse events.**

| <b>Adverse events, n (%)</b> | <b>Grade 1/2</b> | <b>Grade 3/4</b> | <b>Total</b> |
|------------------------------|------------------|------------------|--------------|
| Weakness                     | 3(10%)           | 0                | 3(10%)       |
| Nausea                       | 5(16.7%)         | 0                | 5(16.7%)     |
| Vomit                        | 0                | 1(3.3%)          | 1(3.3%)      |
| Diarrhea                     | 3(10%)           | 0                | 3(10%)       |
| Sinus bradycardia            | 1(3.3%)          | 0                | 1(3.3%)      |
| Rash                         | 3(10%)           | 1(3.3%)          | 4(13.3%)     |
| Dry skin                     | 1(3.3%)          | 0                | 1(3.3%)      |
| Mucositis oral               | 2(6.7%)          | 0                | 2(6.7%)      |
| Lung infection               | 0                | 1(3.3%)          | 1(3.3%)      |
| Anemia                       | 2(6.7%)          | 0                | 2(6.7%)      |
| Neutropenia                  | 1(3.3%)          | 9(30.0%)         | 10(33.3%)    |
| Creatinine increased         | 8(26.7%)         | 2(6.7%)          | 10(33.3%)    |
| ALT/AST elevated             | 0                | 1(3.3%)          | 1(3.3%)      |
| Bilirubin increased          | 0                | 1(3.3%)          | 1(3.3%)      |
| Pancreatic enzymes elevated  | 0                | 1(3.3%)          | 1(3.3%)      |
| Hypophysitis                 | 1(3.3%)          | 0                | 1(3.3%)      |
| Hyperthyroidism              | 1(3.3%)          | 0                | 1(3.3%)      |
| Esophageal fistula           | 1(3.3%)          | 0                | 1(3.3%)      |

**Supplementary Table 2. Perioperative complications.**

| n=25                               |           |           |      |           |     |
|------------------------------------|-----------|-----------|------|-----------|-----|
| Perioperative complications, n (%) | I         | II        | IIIa | IIIb      | IVa |
| Anastomotic stricture              |           | 1(14.29%) |      |           |     |
| Broncho-esophageal fistula         |           | 1(14.29%) |      | 1(14.29%) |     |
| Fever                              | 1(14.29%) |           |      |           |     |
| Pneumonia                          |           | 1(14.29%) |      |           |     |
| Thrombosis                         |           | 1(14.29%) |      |           |     |
| Hypokalemia                        | 1(14.29%) |           |      |           |     |

**Supplementary Table 3. The differences of baseline clinical characteristics between the pCR group and non-pCR group.**

|                           | pCR            | non-pCR        | P value |
|---------------------------|----------------|----------------|---------|
| n                         | 11             | 14             |         |
| Age (yr), mean (SD)       | 59.3 (4.6)     | 61.2 (4.9)     | 0.326   |
| Sex, n (%)                |                |                | 1       |
| Female                    | 2 (18.2)       | 2 (14.3)       |         |
| Male                      | 9 (81.8)       | 12 (85.7)      |         |
| Location, n (%)           |                |                | 0.307   |
| Upper                     | 3 (27.3)       | 1 (7.1)        |         |
| Middle                    | 4 (36.4)       | 4 (28.6)       |         |
| Lower                     | 4 (36.4)       | 9 (64.3)       |         |
| Length (cm), median [IQR] | 4.1 [4.0, 7.5] | 5.0 [4.0, 6.0] | 0.884   |
| T stage, n (%)            |                |                | 1       |
| T2                        | 1 (9.1)        | 1 (7.1)        |         |
| T3                        | 6 (54.5)       | 7 (50.0)       |         |
| T4                        | 4 (36.4)       | 6 (42.9)       |         |
| N stage, n (%)            |                |                | 0.664   |
| N1                        | 5 (45.5)       | 5 (35.7)       |         |
| N2                        | 5 (45.5)       | 5 (35.7)       |         |
| N3                        | 1 (9.1)        | 4 (28.6)       |         |
| TNM Stage, n (%)          |                |                | 0.695   |

|                     |     |          |           |       |
|---------------------|-----|----------|-----------|-------|
|                     | III | 6 (54.5) | 6 (42.9)  |       |
|                     | IVA | 5 (45.5) | 8 (57.1)  |       |
| <hr/>               |     |          |           |       |
| Grade, n (%)        |     |          |           | 0.919 |
|                     | G1  | 1 (9.1)  | 1 (7.1)   |       |
|                     | G2  | 7 (63.6) | 8 (57.1)  |       |
|                     | G3  | 1 (9.1)  | 3 (21.4)  |       |
|                     | Gx  | 2 (18.2) | 2 (14.3)  |       |
| <hr/>               |     |          |           |       |
| Smoke status, n (%) |     |          |           | 1     |
|                     | N   | 4 (36.4) | 4 (28.6)  |       |
|                     | Y   | 7 (63.6) | 10 (71.4) |       |
| <hr/>               |     |          |           |       |
| Drink status, n (%) |     |          |           | 0.288 |
|                     | N   | 3 (27.3) | 1 (7.1)   |       |
|                     | Y   | 8 (72.7) | 13 (92.9) |       |
| <hr/>               |     |          |           |       |

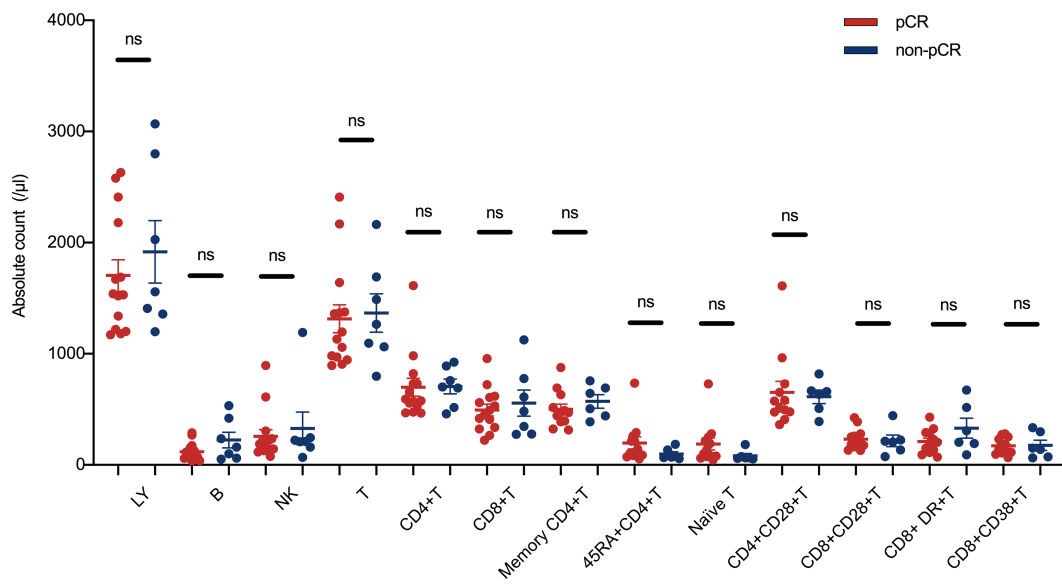

**Supplementary Figure 1. The differences of baseline lymphocyte subset between the pCR and non-pCR group.**

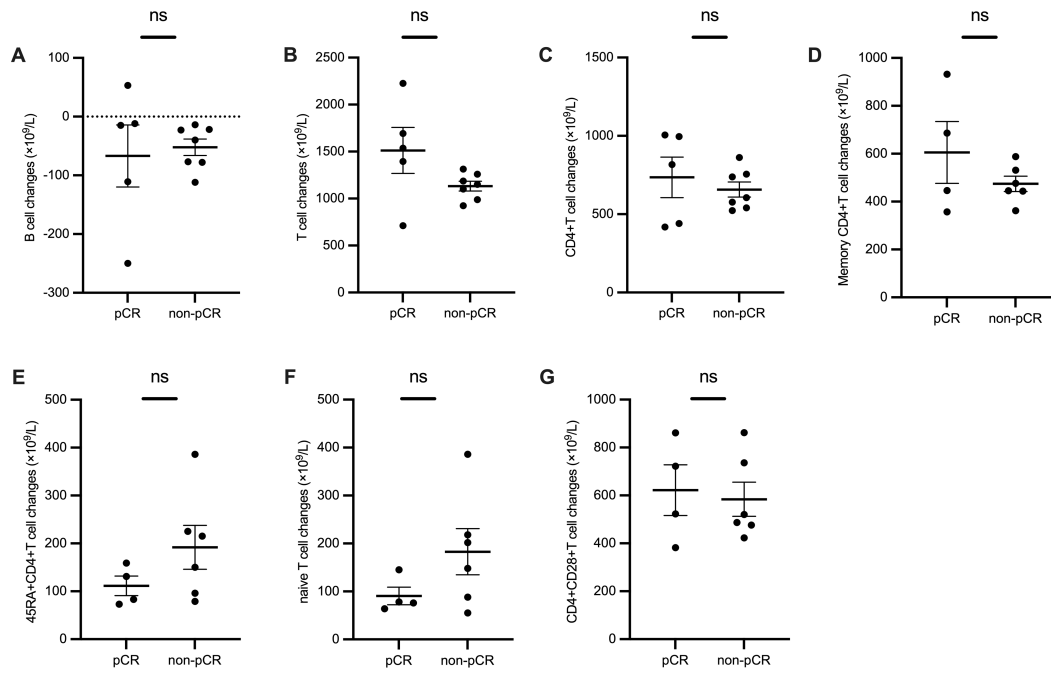

**Supplementary Figure 2. The differences of other lymphocyte subset changes after 2 cycles of neoadjuvant treatment between the pCR and non-pCR group.**
